# Supplementary material for: A Kidney-Targeted Nanoparticle to Augment Renal Lymphatic Density Decreases Blood Pressure in Hypertensive Mice
Source: MDPI journal article supplement (doi:10.3390/pharmaceutics14010084), 2021-12-30
Supplement: s1 [file s1]

# Supplementary Materials: A Kidney-Targeted Nanoparticle to Augment Renal Lymphatic Density Decreases Blood Pressure in Hypertensive Mice

Bethany L. Goodlett <sup>1</sup>, Chang Sun Kang <sup>2</sup>, Eunsoo Yoo <sup>2</sup>, Shobana Navaneethabalakrishnan <sup>1</sup>,  
Dakshnapriya Balasubbramanian <sup>1</sup>, Sydney E. Love <sup>1</sup>, Braden M. Sims <sup>1</sup>, Daniela L. Avilez <sup>1</sup>, Winter Tate <sup>1</sup>,  
Delilah R. Chavez <sup>1</sup>, Gaurav Baranwal <sup>1</sup>, Mary B. Nabity <sup>3</sup>, Joseph M. Rutkowski <sup>1</sup>, Dongin Kim <sup>2</sup>  
and Brett M. Mitchell <sup>1,\*</sup>

<sup>1</sup> Department of Medical Physiology, College of Medicine, Texas A&M University, Bryan, TX 77807, USA; bethany.goodlett@tam.u.edu (B.L.G.); navshobi27@exchange.tam.u.edu (S.N.); Dakshna.Bala@childrens.harvard.edu (D.B.); sydney.love99@tam.u.edu (S.E.L.); bradensims@tam.u.edu (B.M.S.); danielalaavilez@tam.u.edu (D.L.A.); winterwinter97@tam.u.edu (W.T.); delilahrchavez@tam.u.edu (D.R.C.); gauravbaranwal@tam.u.edu (G.B.); rutkowski@tam.u.edu (J.M.R.); brettmitchell@tam.u.edu (B.M.M.)

<sup>2</sup> Department of Pharmaceutical Sciences, College of Pharmacy, Texas A&M University, College Station, TX 77843, USA; chang-kang@ouhsc.edu (C.S.K.); eyoo@ncat.edu (E.Y.); Dongin-Kim@ouhsc.edu (D.K.)

<sup>3</sup> Department of Veterinary Pathobiology, College of Veterinary Medicine & Biomedical Science, Texas A&M University, College Station, TX 77843, USA; mnabity@cvm.tam.u.edu (M.B.N.)

\* Correspondence: Brett Mitchell, PhD, ORCID: 0000-0002-2575-8761, 8447 Riverside Parkway, Bryan, TX 77807, Ph:+ 1-979-436-0751, brettmitchell@tam.u.edu

No. AI168

## Certificate of Analysis

Product Name: Poly(lactide-co-glycolide)-b-Poly(ethylene glycol)-folate  
(10,000-2,000Da) Lot #200306RAI-A

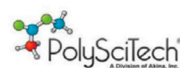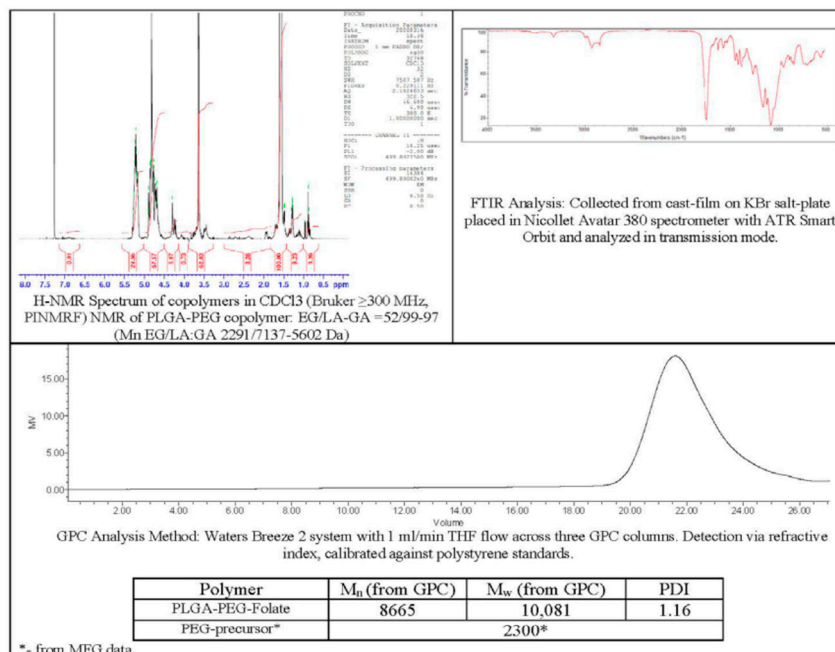

### Structure of PLGA-PEG-Folate

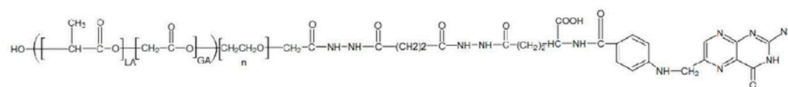

PolySciTech Division of Akina, Inc. | 3495 Kent Avenue, West Lafayette, IN 47906  
765-464-0390 | www.polyscitech.com  
For research use only.

**Figure S1. Certificate of analysis provided by PolySciTech.** The NMR, FTIR analysis, and the GPC for the PLGA-PEG-folate polymer.

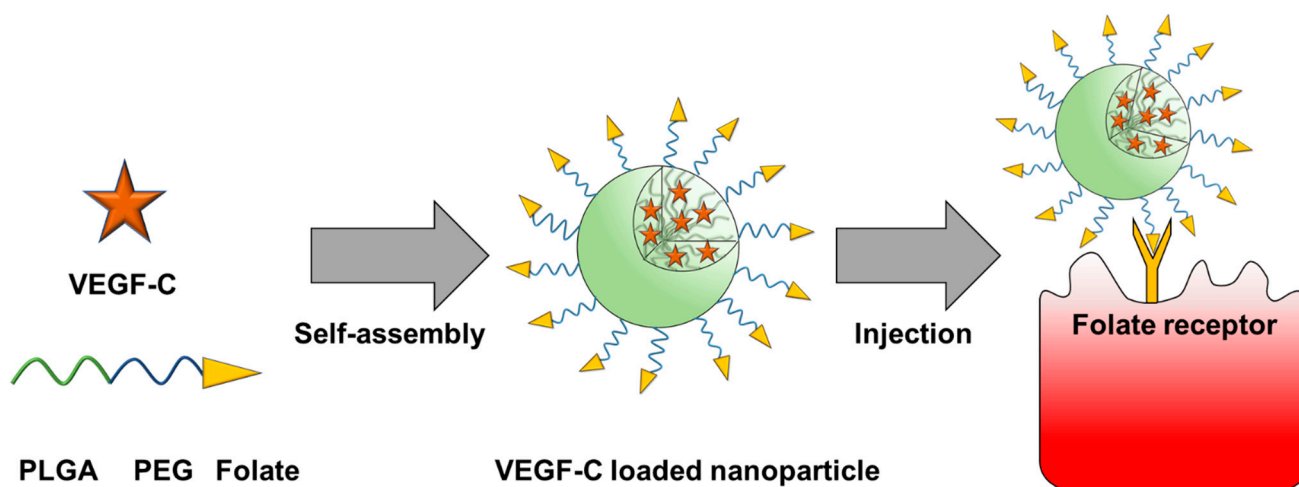

**Figure S2. Schematic for nanoparticle assembly.** PLGA, PEG, folate, and VEGF-C were utilized for the nanoparticle assembly followed by injection into the mouse.

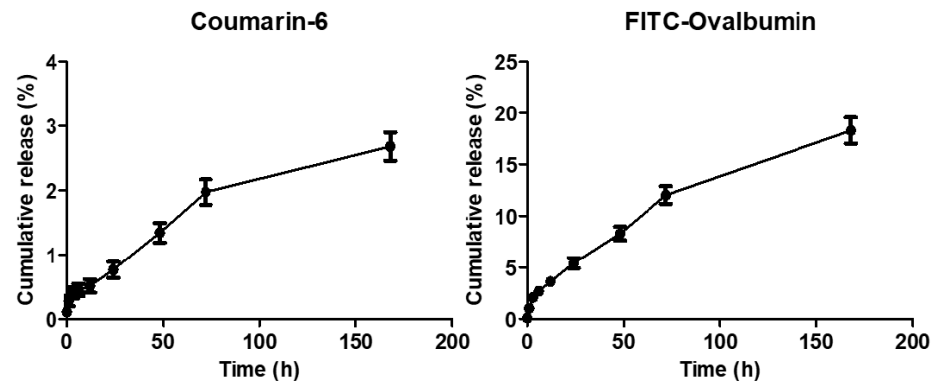

**Figure S3.** Cumulative release of Coumarin 6 and FITC-ovalbumin from the folate nanoparticles. The % of cumulative release over hours for both Coumarin 6 and FITC-ovalbumin.

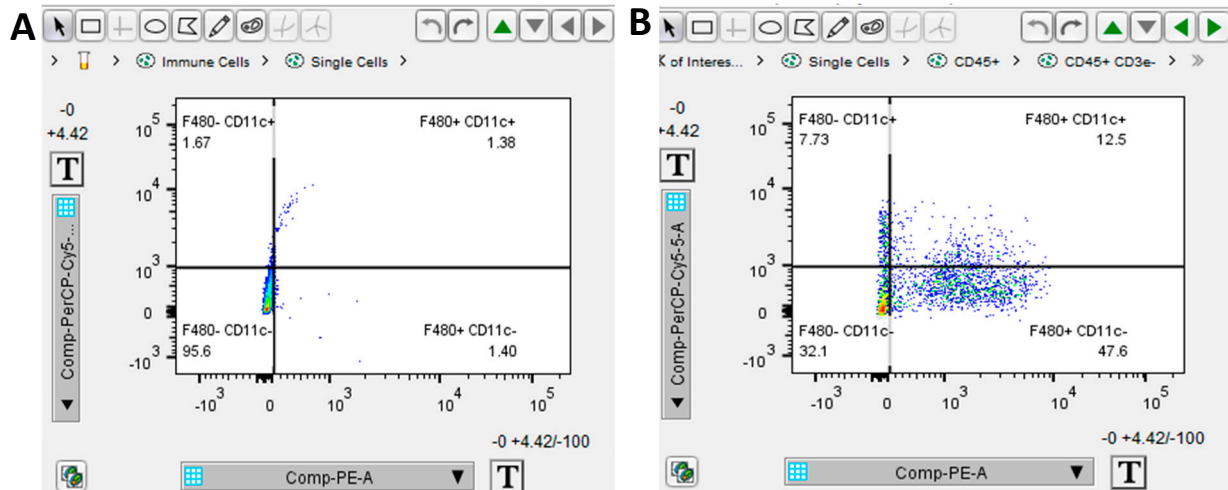

**Figure S4.** Gating strategy for renal immune cell analysis. (A) An unstained control kidney and (B) a fully stained kidney sample. Data was imported to FlowJo and gated for single, live cells. Then, a quadrant gate was used to determine the presence or absence of F4/80+ and CD11c+ cells. A similar approach was used for CD3+ T cells.

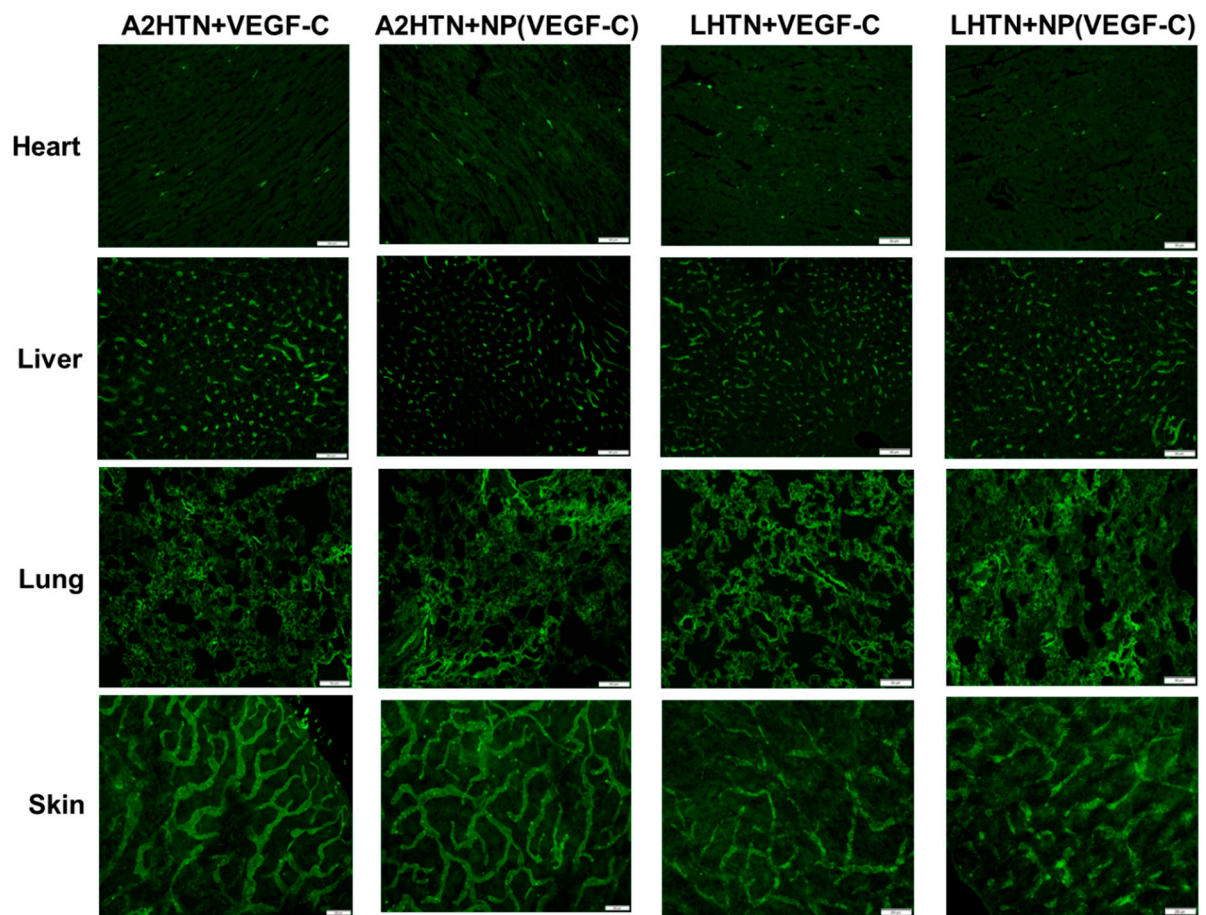

**Figure S5. No increase in extra-renal lymphatic vessel density in hypertensive mice treated with VEGF-C in nanoparticles.** LYVE-1 staining (green) in tissues from A2HTN and LHTN mice treated with VEGF-C in NPs or VEGF-C alone. Scale bars = 100  $\mu$ m for heart, liver, and lung, and 200  $\mu$ m for ear skin.

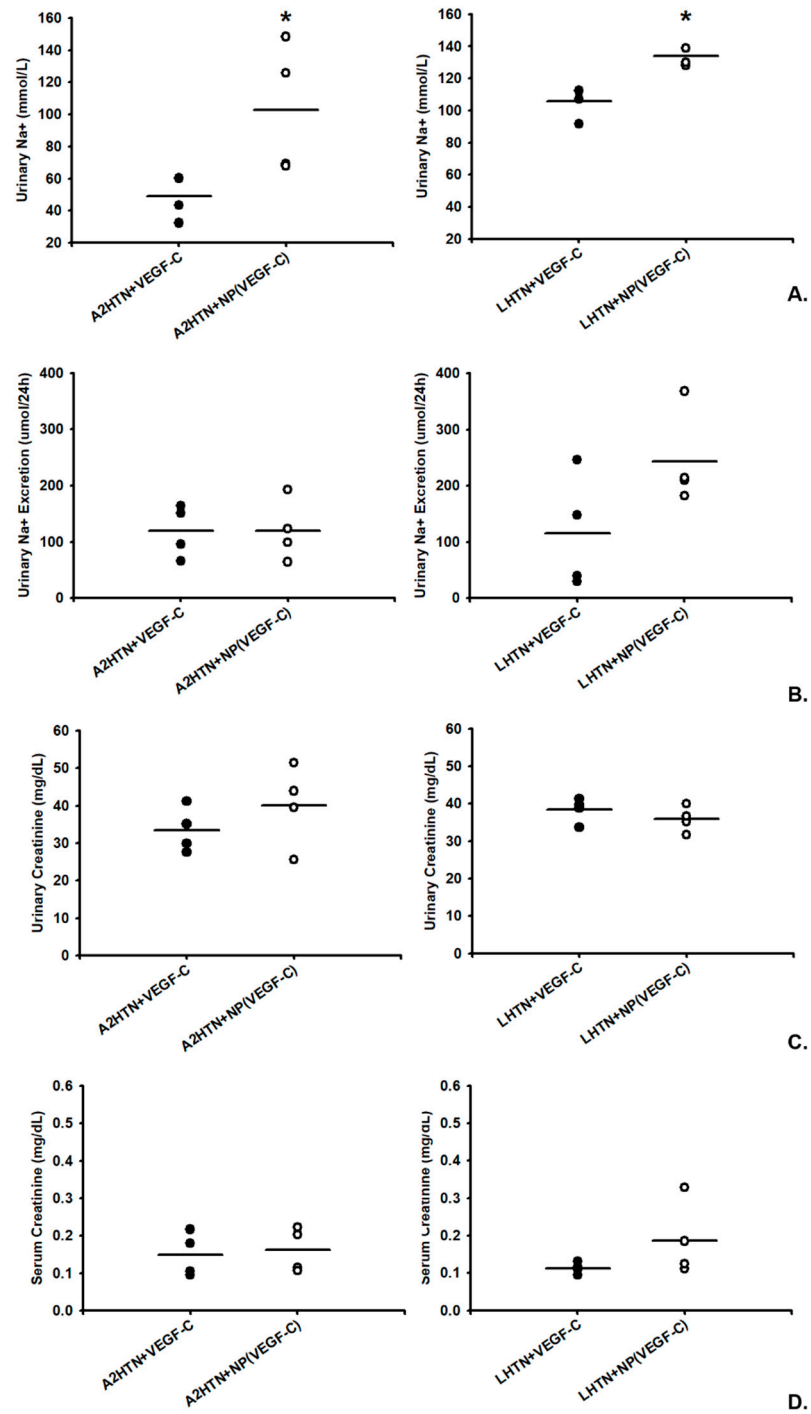

**Figure S6. Treatment with VEGF-C in NPs significantly increased urinary sodium.** (A) Urinary sodium, (B) urinary sodium excretion, (C) urinary creatinine, and (D) serum creatinine in male and female A2HTN and LHTN mice treated every 3 days with VEGF-C in NPs or VEGF-C alone. Urine samples were collected over a 24-hour period. Results are expressed as mean ( $n = 4-5$  per group) and statistical analyses were performed with Student's  $t$  test. \* $P < 0.05$  vs VEGF-C alone treated mice.

**Table S1.** Flow cytometry panel description for mouse kidneys.

| Fluorochrome       | FITC   | PacBlue | PE       | PerCP-Cy5.5 |
|--------------------|--------|---------|----------|-------------|
| Antigen            | CD45.2 | CD3e    | F4/80    | CD11c       |
| Final Conc (µg/mL) | 2.5    | 0.1     | 0.25     | 0.5         |
| Dilution Factor    | 1:200  | 1:2,000 | 1:400    | 1:400       |
| Clone              | 104    | 500A2   | T45-2342 | HL3         |

Abbreviations: FITC = fluorescein isothiocyanate; PacBlue = pacific blue; PE = phycoerythrin; PerCP-Cy5.5 = peridinin chlorophyll protein complex cyanine 5.5.

**Table S2.** Body and tissue weights for the A2HTN group.

|                  | Body Weight<br>(BW) (g) |     | R Kidney (mg)/BW |     | L Kidney (mg)/BW |     | Spleen (mg)/BW |     |
|------------------|-------------------------|-----|------------------|-----|------------------|-----|----------------|-----|
|                  | M                       | SE  | M                | SE  | M                | SE  | M              | SE  |
| A2HTN+VEGF-C     | 28.5                    | 1.9 | 6.3              | 0.4 | 5.9              | 0.4 | 3.2            | 0.5 |
| A2HTN+NP(VEGF-C) | 27.1                    | 3.1 | 6.1              | 0.4 | 5.4              | 0.4 | 3.6            | 0.4 |

**Table S3.** Body and tissue weights for the LHTN group.

|                 | Body Weight<br>(BW) (g) |     | R Kidney<br>(mg)/BW |     | L Kidney (mg)/BW |     | Spleen (mg)/BW |     |
|-----------------|-------------------------|-----|---------------------|-----|------------------|-----|----------------|-----|
|                 | M                       | SE  | M                   | SE  | M                | SE  | M              | SE  |
| LHTN+VEGF-C     | 27.1                    | 2.5 | 6.7                 | 0.3 | 7.1              | 0.2 | 3.4            | 0.5 |
| LHTN+NP(VEGF-C) | 27.5                    | 3.5 | 6.3                 | 0.2 | 7.4              | 0.4 | 2.6            | 0.5 |
